# Supplementary material for: Earth Orbit v2.1: a 3-D visualization and analysis model of Earth's orbit, Milankovitch cycles and insolation
Source: Copernicus journal article supplement (doi:10.5194/gmd-7-1051-2014), 2014-06-03
Supplement: Supplementary file 1 [file gmd-7-1051-2014-supplement.zip]

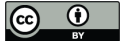

## *Supplement of*

# **Earth Orbit v2.1: a 3-D visualization and analysis model of Earth's orbit, Milankovitch cycles and insolation**

**T. S. Kostadinov and R. Gillb**

*Correspondence to:* T. S. Kostadinov (tkostadi@richmond.edu)

- Supplement-Cover-Letter.pdf
- Earth\_orbit\_v2\_1\_REVISED
  - Berger78\_data.dat
  - Berger\_orbpar.m
  - EPICA\_CO2.dat
  - EPICA\_deuterium.dat
  - Earth\_orbit\_v2\_1.fig
  - Earth\_orbit\_v2\_1.m
  - INSOLN.LA2004.BTL.100.ASC
  - INSOLP.LA2004.BTL.ASC
  - LR04\_dO18\_benthic\_stack.dat
  - ReadMe.txt
  - Zachos01\_d18O.dat
  - contemp\_insol.dat
  - generate\_rot\_m.m
  - getLaskar.m
  - insol\_3d.m
  - insol\_TS.m
  - insolation.m
  - keplerian.m
  - keplerian\_inverse.m
  - orbit.m
  - orbit\_output
    - \* Insolation\_115Ky\_BP.dat
    - \* Insolation\_anomaly\_115Ky\_BP.dat
    - \* Insolation\_time\_series.dat
